# Supplementary material for: Symbiosis with Dinoflagellates Alters Cnidarian Cell-Cycle Gene Expression
Source: Hindawi journal article supplement (doi:10.1155/2022/3330160), 2022-05-23
Supplement: f1 [file 3330160.f1.txt]

	target_id	pval	qval <0.05 = significant	b ( >0 = up-regulated, <0 = downregulated)	se_b	annotation	KEGG_KO	KEGG_MAP	GO
Sym Endo Vs Apo Endo	AIPGENE20570	0.000	0.000	1.492	0.159	Dual specificity protein phosphatase CDC14A OS=Homo sapiens GN=CDC14A PE=1 SV=1	K06639
	AIPGENE26697	0.000	0.000	1.111	0.164	E3 ubiquitin-protein ligase Mdm2 OS=Equus caballus GN=MDM2 PE=2 SV=1	K06643
	AIPGENE22512	0.000	0.002	-0.596	0.160	Transcription factor Dp-1 OS=Homo sapiens GN=TFDP1 PE=1 SV=1	K04683
	AIPGENE561	0.000	0.004	-1.489	0.414	Cell division cycle protein 20 homolog OS=Rattus norvegicus GN=Cdc20 PE=1 SV=2	K03363
	AIPGENE2130	0.001	0.008	-0.833	0.250	Mitotic checkpoint serine/threonine-protein kinase BUB1 beta OS=Mus musculus GN=Bub1b PE=1 SV=2	K06637
	AIPGENE12491	0.001	0.010	-0.920	0.282	Dual specificity protein kinase Ttk OS=Danio rerio GN=ttk PE=1 SV=2	K08866
	AIPGENE8456	0.001	0.012	-0.859	0.267	Zygotic DNA replication licensing factor mcm6-A OS=Xenopus laevis GN=zmcm6-a PE=1 SV=1	K02542
	AIPGENE13245	0.001	0.013	0.713	0.224	Histone deacetylase 2 OS=Homo sapiens GN=HDAC2 PE=1 SV=2	K06067
	AIPGENE14397	0.002	0.014	-0.782	0.247	Cyclin-dependent kinase 6 OS=Mus musculus GN=Cdk6 PE=1 SV=2	K02091
	AIPGENE804	0.002	0.016	-0.479	0.154	14-3-3 protein epsilon OS=Ovis aries GN=YWHAE PE=1 SV=1	K06630
	AIPGENE10534	0.002	0.016	-1.255	0.403	G2/mitotic-specific cyclin-B3 OS=Gallus gallus GN=CCNB3 PE=2 SV=1	K05868
	AIPGENE5823	0.002	0.018	0.504	0.164	Cullin-1 OS=Pongo abelii GN=CUL1 PE=2 SV=1	K03347
	AIPGENE29020	0.002	0.019	-0.675	0.222	Zygotic DNA replication licensing factor mcm3 OS=Xenopus tropicalis GN=zmcm3 PE=2 SV=1	K02541
	AIPGENE19331	0.003	0.020	-1.022	0.338	M-phase inducer phosphatase OS=Drosophila melanogaster GN=stg PE=1 SV=2	K05866
	AIPGENE3823	0.003	0.024	-1.644	0.557	Cyclin-dependent kinase 1 OS=Carassius auratus GN=cdk1 PE=2 SV=1	K02087
	AIPGENE15738	0.003	0.025	1.180	0.402	S-phase kinase-associated protein 2 OS=Homo sapiens GN=SKP2 PE=1 SV=2	K03875
	AIPGENE15719	0.004	0.027	-0.902	0.311	S-phase kinase-associated protein 2 OS=Homo sapiens GN=SKP2 PE=1 SV=2	K03875
	AIPGENE7783	0.005	0.036	-0.583	0.209	Serine/threonine-protein kinase PLK1 OS=Mus musculus GN=Plk1 PE=1 SV=2	K06631
	AIPGENE10647	0.005	0.037	1.356	0.488	Transcription factor Dp-1 OS=Homo sapiens GN=TFDP1 PE=1 SV=1	K04683,K09392
	AIPGENE22485	0.006	0.041	1.439	0.526	Transcription factor Dp-1 OS=Homo sapiens GN=TFDP1 PE=1 SV=1	K04683,K09392
	AIPGENE19027	0.007	0.044	0.914	0.337	Growth arrest and DNA damage-inducible protein GADD45 gamma OS=Mus musculus GN=Gadd45g PE=1 SV=1	K04402
Sym Endo VS Sym Ecto	AIPGENE2563	0.000	0.000	-3.550	0.732552604	Transcriptional regulator Myc-B OS=Danio rerio GN=mycb PE=2 SV=1	K04377	map04010,map04012,map04110,map04151,map04310,map04350,map04390,map04391,map04550,map04630,map04919,map05161,map05166,map05169,map05200,map05202,map05205,map05206,map05210,map05213,map05216,map05219,map05220,map05221,map05222,map05230	GO:0003677,GO:0003700,GO:0005634,GO:0006351,GO:0006355,GO:0046983
	AIPGENE2519	0.000	0.002	-1.052	0.272632037	Transcriptional regulator Myc-1 OS=Cyprinus carpio GN=myca PE=3 SV=1	K04377	map04010,map04012,map04110,map04151,map04310,map04350,map04390,map04391,map04550,map04630,map04919,map05161,map05166,map05169,map05200,map05202,map05205,map05206,map05210,map05213,map05216,map05219,map05220,map05221,map05222,map05230	GO:0003677,GO:0003700,GO:0005634,GO:0006351,GO:0006355,GO:0046983
	AIPGENE26697	0.000	0.006	0.889	0.25157426	E3 ubiquitin-protein ligase Mdm2 OS=Equus caballus GN=MDM2 PE=2 SV=1	K06643	map04068,map04110,map04115,map04120,map04144,map04151,map04919,map05169,map05200,map05202,map05203,map05205,map05206,map05214,map05215,map05218,map05219,map05220	GO:0000122,GO:0005634,GO:0005654,GO:0005730,GO:0005737,GO:0008270,GO:0016567,GO:0016874,GO:0043066,GO:0045892,GO:0046872,GO:0071157
	AIPGENE27523	0.000	0.006	0.840	0.24011585	Mothers against decapentaplegic homolog 1 OS=Rattus norvegicus GN=Smad1 PE=1 SV=1	K04501	map04068,map04110,map04310,map04350,map04390,map04520,map04550,map05161,map05166,map05200,map05210,map05212,map05220	GO:0000165,GO:0000979,GO:0001657,GO:0001710,GO:0001822,GO:0002051,GO:0003677,GO:0003700,GO:0005515,GO:0005622,GO:0005634,GO:0005637,GO:0005667,GO:0005737,GO:0006351,GO:0006355,GO:0006357,GO:0006468,GO:0006954,GO:0007179,GO:0007183,GO:0007276,GO:0008285,GO:0009880,GO:0010243,GO:0010628,GO:0010656,GO:0019901,GO:0030509,GO:0030901,GO:0030902,GO:0042060,GO:0042493,GO:0042592,GO:0042802,GO:0045597,GO:…
	AIPGENE16487	0.002	0.017	-2.327	0.739403235	Serine/threonine-protein kinase PLK1 OS=Mus musculus GN=Plk1 PE=1 SV=2	K06631,K06660	map04068,map04110,map04114,map04914,map04111,map04113	GO:0000070,GO:0000086,GO:0000122,GO:0000166,GO:0000281,GO:0000775,GO:0000776,GO:0000777,GO:0000910,GO:0000922,GO:0000942,GO:0001578,GO:0004672,GO:0004674,GO:0005515,GO:0005524,GO:0005634,GO:0005694,GO:0005737,GO:0005813,GO:0005815,GO:0005819,GO:0005856,GO:0005876,GO:0006468,GO:0007049,GO:0007067,GO:0007092,GO:0007094,GO:0007346,GO:0008017,GO:0010800,GO:0010997,GO:0016301,GO:0016310,GO:0016567,GO:…
	AIPGENE29020	0.002	0.019	-0.799	0.256608497	Zygotic DNA replication licensing factor mcm3 OS=Xenopus tropicalis GN=zmcm3 PE=2 SV=1	K02541	map03030,map04110,map04111,map04113	GO:0000166,GO:0003677,GO:0003678,GO:0004386,GO:0005524,GO:0005634,GO:0006260,GO:0006270,GO:0007049,GO:0016787,GO:0017111,GO:0032508,GO:0042555
	AIPGENE9815	0.003	0.027	-0.821	0.276370659	Serine-protein kinase ATM OS=Mus musculus GN=Atm PE=1 SV=2	K04728	map04064,map04068,map04110,map04115,map04210,map05166,map05202,map05206	GO:0000077,GO:0000166,GO:0000723,GO:0000781,GO:0001666,GO:0001756,GO:0002331,GO:0003677,GO:0004672,GO:0004674,GO:0004677,GO:0005515,GO:0005524,GO:0005634,GO:0005654,GO:0005737,GO:0005819,GO:0006281,GO:0006468,GO:0006915,GO:0006974,GO:0006975,GO:0007049,GO:0007050,GO:0007094,GO:0007292,GO:0007420,GO:0007507,GO:0008630,GO:0010212,GO:0016023,GO:0016301,GO:0016303,GO:0016310,GO:0016572,GO:0016740,GO:…
	AIPGENE22485	0.004	0.031	1.881	0.645707366	Transcription factor Dp-1 OS=Homo sapiens GN=TFDP1 PE=1 SV=1	K04683,K09392	map04110,map04350	GO:0000082,GO:0000278,GO:0003677,GO:0003700,GO:0003713,GO:0005515,GO:0005634,GO:0005654,GO:0005667,GO:0006351,GO:0006355,GO:0006357,GO:0006367,GO:0006915,GO:0007049,GO:0007179,GO:0007219,GO:0008134,GO:0008283,GO:0010467,GO:0019904,GO:0045944,GO:0097193,GO:1900740
	AIPGENE28094	0.004	0.034	1.287	0.446696659	Transcription factor E2F3 OS=Mus musculus GN=E2f3 PE=1 SV=2	K06620	map04110,map05161,map05166,map05200,map05206,map05212,map05214,map05215,map05218,map05219,map05220,map05222,map05223	GO:0001047,GO:0003677,GO:0003700,GO:0005515,GO:0005634,GO:0005667,GO:0006351,GO:0006355,GO:0007049,GO:0008284,GO:0045893
Sym Ecto Vs Apo Ecto	AIPGENE20640	0.000	0.027	0.979	0.262	MOB kinase activator 1B OS=Mus musculus GN=Mob1b PE=1 SV=3	K06685	map04111,map04390,map04391	GO:0005634,GO:0005737,GO:0019209,GO:0019900,GO:0035329,GO:0042327,GO:0046777,GO:0046872
Apo Endo Vs Apo ecto	AIPGENE27523	4.25E-05	0.001547919	0.809	0.197693815	Mothers against decapentaplegic homolog 1 OS=Rattus norvegicus GN=Smad1 PE=1 SV=1	K04501	map04068,map04110,map04310,map04350,map04390,map04520,map04550,map05161,map05166,map05200,map05210,map05212,map05220	GO:0000165,GO:0000979,GO:0001657,GO:0001710,GO:0001822,GO:0002051,GO:0003677,GO:0003700,GO:0005515,GO:0005622,GO:0005634,GO:0005637,GO:0005667,GO:0005737,GO:0006351,GO:0006355,GO:0006357,GO:0006468,GO:0006954,GO:0007179,GO:0007183,GO:0007276,GO:0008285,GO:0009880,GO:0010243,GO:0010628,GO:0010656,GO:0019901,GO:0030509,GO:0030901,GO:0030902,GO:0042060,GO:0042493,GO:0042592,GO:0042802,GO:0045597,GO:…
	AIPGENE22427	0.003409885	0.044456944	-0.770	0.262805386	Putative uncharacterized protein OS=Branchiostoma floridae GN=BRAFLDRAFT_120626 PE=4 SV=1	K06624	map04066,map04068,map04110,map04151,map05161,map05162,map05169,map05200,map05202,map05203,map05206,map05215,map05220	GO:0004861,GO:0005634,GO:0007050,GO:0071901
	AIPGENE5780	0.003435291	0.044622495	-0.675	0.230730353	Origin recognition complex subunit 3 OS=Homo sapiens GN=ORC3 PE=1 SV=1	K02605	map04110,map04111,map04113	GO:0000082,GO:0000278,GO:0000808,GO:0003677,GO:0003688,GO:0005515,GO:0005634,GO:0005654,GO:0005664,GO:0006260,GO:0061351
	AIPGENE20570	0.003807387	0.047715623	-0.584	0.201930626	Dual specificity protein phosphatase CDC14A OS=Homo sapiens GN=CDC14A PE=1 SV=1	K06639	map04110,map04111,map04113	GO:0004721,GO:0004725,GO:0005515,GO:0005634,GO:0005737,GO:0005813,GO:0005815,GO:0005819,GO:0005856,GO:0006470,GO:0007049,GO:0008138,GO:0008283,GO:0016311,GO:0016787,GO:0016791,GO:0035335,GO:0051301
			K04377
			K04377
			K06643
			K04501
			K06631,K06660
			K02541
			K04728
			K04683,K09392
			K06620
			K06685
			K04501
			K06624
			K02605
			K06639
