# Supplementary material for: Symbiosis with Dinoflagellates Alters Cnidarian Cell-Cycle Gene Expression
Source: Hindawi journal article supplement (doi:10.1155/2022/3330160), 2022-05-23
Supplement: f2 [file 3330160.f2.zip]

Archive with 22 entries (22 files):
- Supplementary figure 1.pdf
- Supplementary Figure 10.pdf
- Supplementary Figure 11.pdf
- Supplementary Figure 12.pdf
- Supplementary Figure 13.pdf
- Supplementary Figure 14.pdf
- Supplementary Figure 15.pdf
- Supplementary Figure 16.pdf
- Supplementary Figure 17.pdf
- Supplementary Figure 18.pdf
- Supplementary Figure 19.pdf
- Supplementary Figure 2.pdf
- Supplementary Figure 20.pdf
- Supplementary Figure 21.pdf
- Supplementary Figure 22.pdf
- Supplementary Figure 3.pdf
- Supplementary Figure 4.pdf
- Supplementary Figure 5.pdf
- Supplementary Figure 6.pdf
- Supplementary Figure 7.pdf
- Supplementary Figure 8.pdf
- Supplementary Figure 9.pdf
