# Supplementary material for: Symbiosis with Dinoflagellates Alters Cnidarian Cell-Cycle Gene Expression
Source: Hindawi journal article supplement (doi:10.1155/2022/3330160), 2022-05-23
Supplement: f2 [file 3330160.f2.zip › Supplementary Figure 6.pdf]

Tree scale: 1

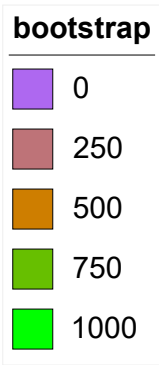

*Homo sapiens* CABLES1  
*Homo sapiens* CABLES2  
*Homo sapiens* Cyclin I  
*Stylophora pistillata* Cyclin I  
*Homo sapiens* Cyclin G  
*Drosophila melanogaster* Cyclin G  
*Drosophila melanogaster* Cyclin E  
*Homo sapiens* Cyclin E  
*Nematostella vectensis*  
*Stylophora pistillata* Cyclin E  
*Ephydatia muelleri* Cyclin D  
*Homo sapiens* Cyclin D  
*Drosophila melanogaster* Cyclin D  
*Stylophora pistillata* Cyclin D  
*Nematostella vectensis*  
*Homo sapiens* Cyclin F  
*Nematostella vectensis*  
*Stylophora pistillata* Cyclin F  
*Drosophila melanogaster* Cyclin J  
*Homo sapiens* Cyclin J  
*Stylophora pistillata* Cyclin J  
*Nematostella vectensis*  
*Nematostella vectensis*  
*Stylophora pistillata* Cyclin Y  
*Drosophila melanogaster* Cyclin Y  
*Homo sapiens* Cyclin Y  
*Drosophila melanogaster* Cyclin A  
*Homo sapiens* Cyclin A  
*Nematostella vectensis*  
***Aiptasia diaphana* Cyclin B (AIPGENE10534)**  
*Homo sapiens* Cyclin B  
*Drosophila melanogaster* Cyclin B  
*Nematostella vectensis*  
*Stylophora pistillata* Cyclin B  
*Drosophila melanogaster* Cyclin H  
*Stylophora pistillata* Cyclin C  
*Nematostella vectensis*  
*Drosophila melanogaster* Cyclin C  
*Homo sapiens* Cyclin C  
*Homo sapiens* Cyclin L  
*Nematostella vectensis*  
*Stylophora pistillata* Cyclin T  
*Drosophila melanogaster* Cyclin T  
*Homo sapiens* Cyclin T1  
*Drosophila melanogaster* Cyclin K  
*Homo sapiens* Cyclin K  
*Stylophora pistillata* Cyclin K  
*Nematostella vectensis*
