# Supplementary material for: Symbiosis with Dinoflagellates Alters Cnidarian Cell-Cycle Gene Expression
Source: Hindawi journal article supplement (doi:10.1155/2022/3330160), 2022-05-23
Supplement: f2 [file 3330160.f2.zip › Supplementary Figure 13.pdf]

Tree scale: 1

**bootstrap**

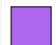

0

250

500

750

1000

*Halisarca dujardinii* HDAC3

*Homo sapiens* HDAC3

*Homo sapiens* HDAC2

*Homo sapiens* HDAC1

*Aiptasia diaphana* HDAC1 (AIPGENE13245)

*Stylophora pistillata* HDAC1

*Stylophora pistillata* HDAC8

*Homo sapiens* HDAC8

*Homo sapiens* SIRT4

*Homo sapiens* SIRT2

*Homo sapiens* SIRT1

*Stylophora pistillata* HDAC11

*Homo sapiens* HDAC11

*Homo sapiens* SIRT6

*Homo sapiens* HDAC6

*Homo sapiens* HDAC10

*Nematostella vectensis* HDAC6

*Stylophora pistillata* HDAC4

*Homo sapiens* HDAC5

*Homo sapiens* HDAC9

*Homo sapiens* HDAC4

*Homo sapiens* HDAC7
