# Supplementary material for: Symbiosis with Dinoflagellates Alters Cnidarian Cell-Cycle Gene Expression
Source: Hindawi journal article supplement (doi:10.1155/2022/3330160), 2022-05-23
Supplement: f2 [file 3330160.f2.zip › Supplementary Figure 16.pdf]

Tree scale: 1

bootstrap

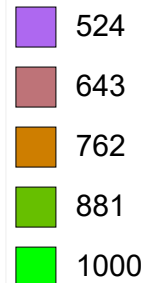

*Amphimedon queenslandica* Mob2  
*Homo sapiens* Mob2  
*Nematostella vectensis* Mob2  
*Drosophila melanogaster* Mob2  
*Homo sapiens* Mob4  
*Drosophila melanogaster* Mob4  
*Drosophila melanogaster* Mob3  
*Nematostella vectensis* Mob3  
*Stylophora pistillata* Mob3  
*Homo sapiens* Mob3B  
*Homo sapiens* Mob3C  
*Homo sapiens* Mob3A  
*Homo sapiens* Mob1A  
*Homo sapiens* Mob1B  
*Drosophila melanogaster* Mob1  
*Stylophora pistillata* Mob1B  
*Nematostella vectensis* Mob1B  
***Aiptasia diaphana* Mob1 (AIPGENE20640)**
