# Supplementary material for: Symbiosis with Dinoflagellates Alters Cnidarian Cell-Cycle Gene Expression
Source: Hindawi journal article supplement (doi:10.1155/2022/3330160), 2022-05-23
Supplement: f2 [file 3330160.f2.zip › Supplementary Figure 17.pdf]

Tree scale: 1

bootstrap

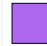

703

774

845

916

987

*Amphimedon queenslandica* Mps1

*Drosophila melanogaster* Mps1

*Homo sapiens* Mps1

*Stylophora pistillata* Mps1

*Nematostella vectensis* Mps1

***Aiptasia diaphana* Mps1 (AIPGENE12491)**
