# Supplementary figures and images for: Symbiosis with Dinoflagellates Alters Cnidarian Cell-Cycle Gene Expression
Source: Hindawi journal article supplement (doi:10.1155/2022/3330160), 2022-05-23

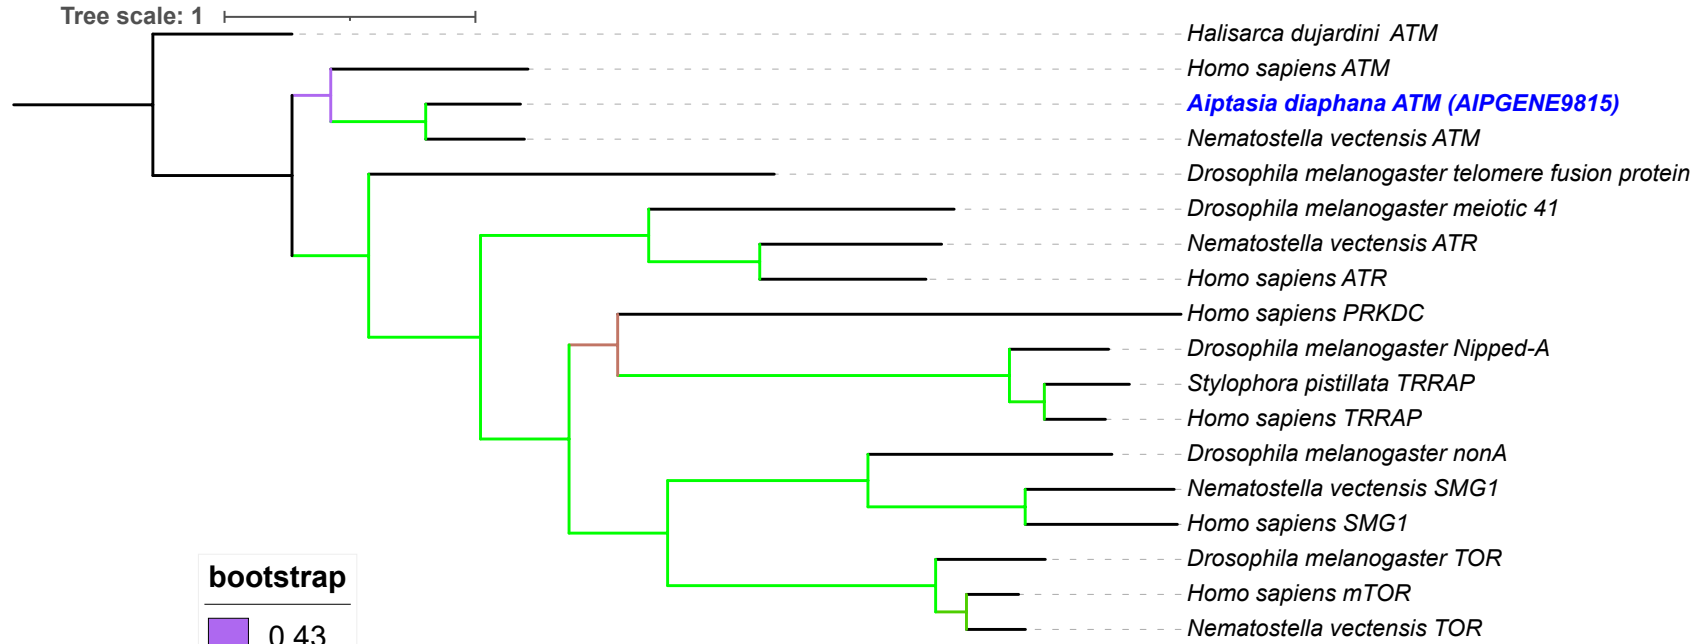

Supplement: f2 [file 3330160.f2.zip › Supplementary figure 1.pdf]

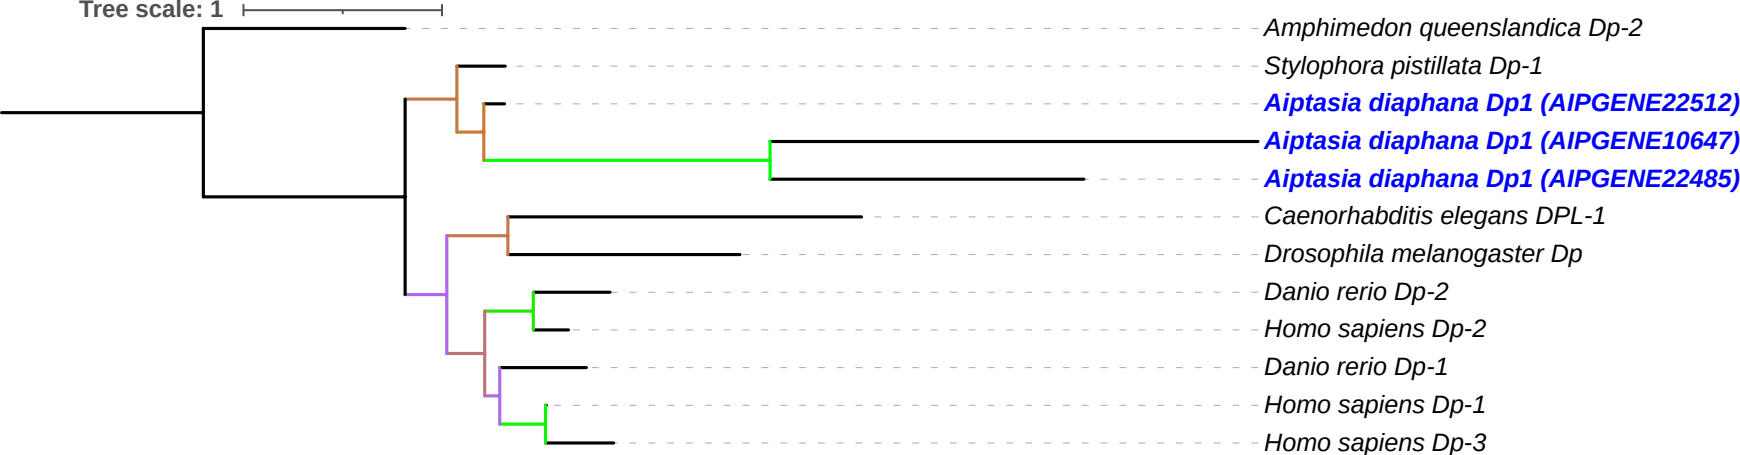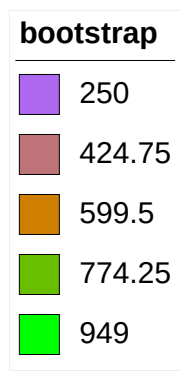

Supplement: f2 [file 3330160.f2.zip › Supplementary Figure 10.pdf]

Tree scale: 1

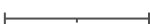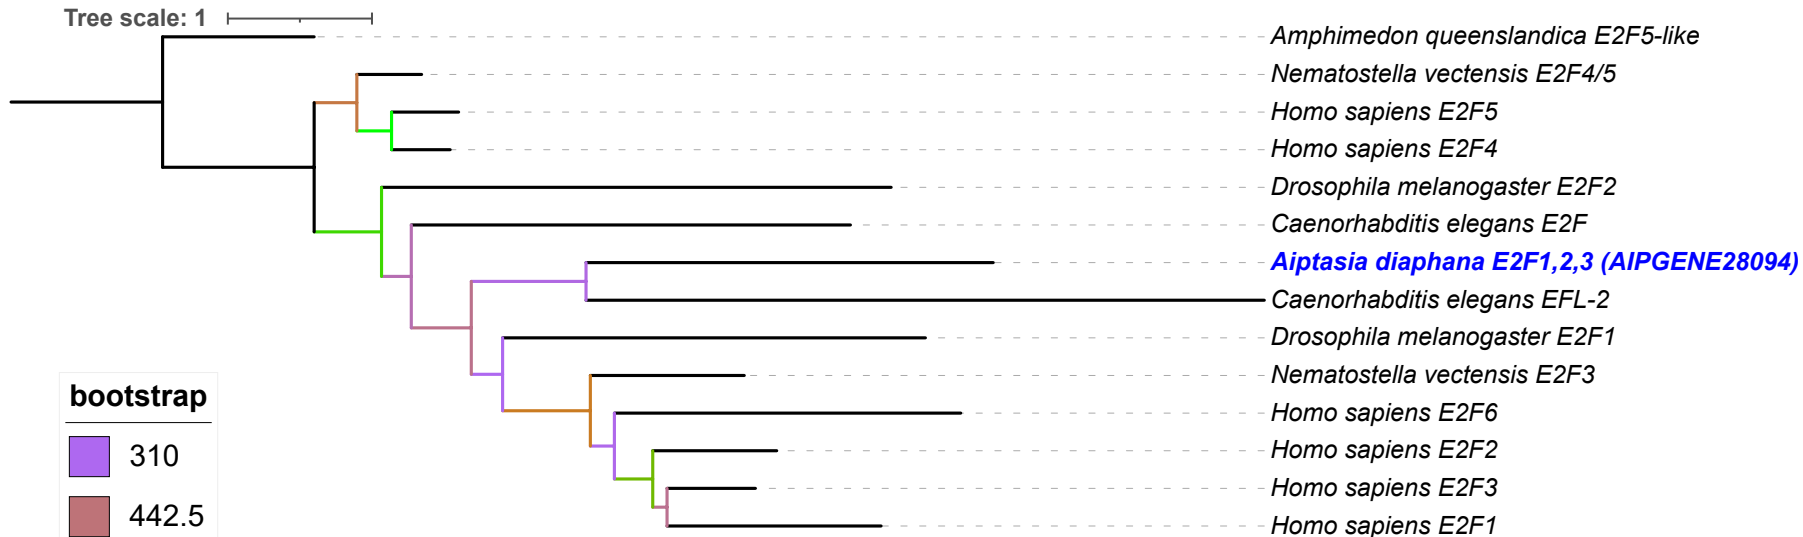

bootstrap

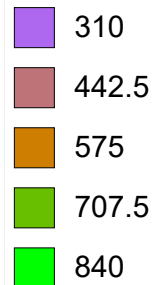

Supplement: f2 [file 3330160.f2.zip › Supplementary Figure 11.pdf]

Tree scale: 1

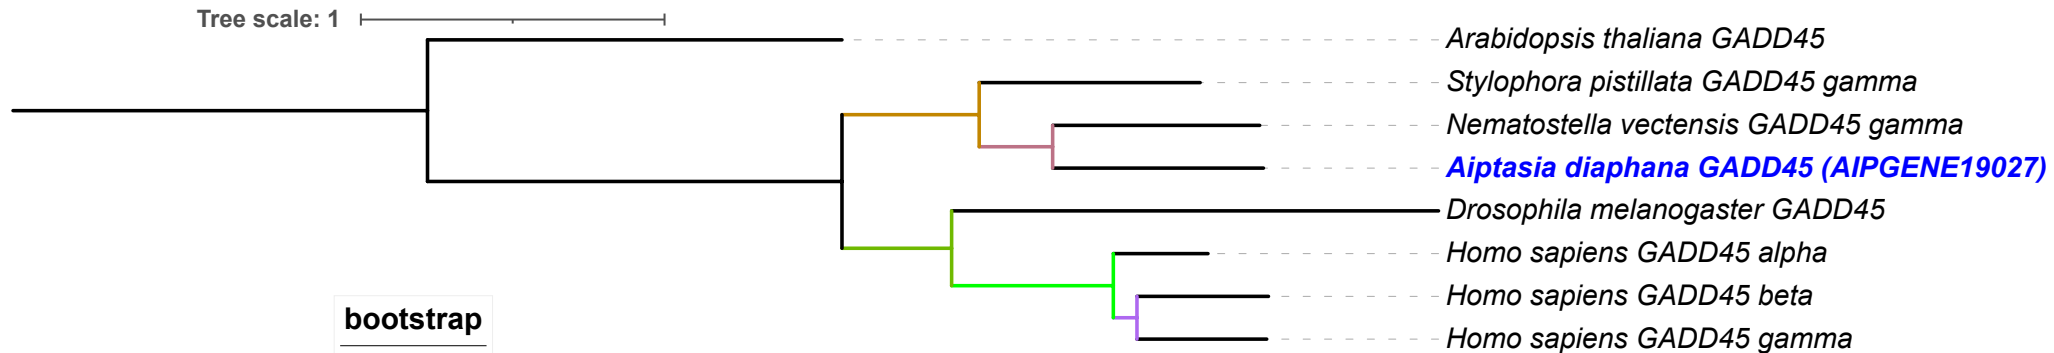

**bootstrap**

399

507

615

723

831

Supplement: f2 [file 3330160.f2.zip › Supplementary Figure 12.pdf]

Tree scale: 10

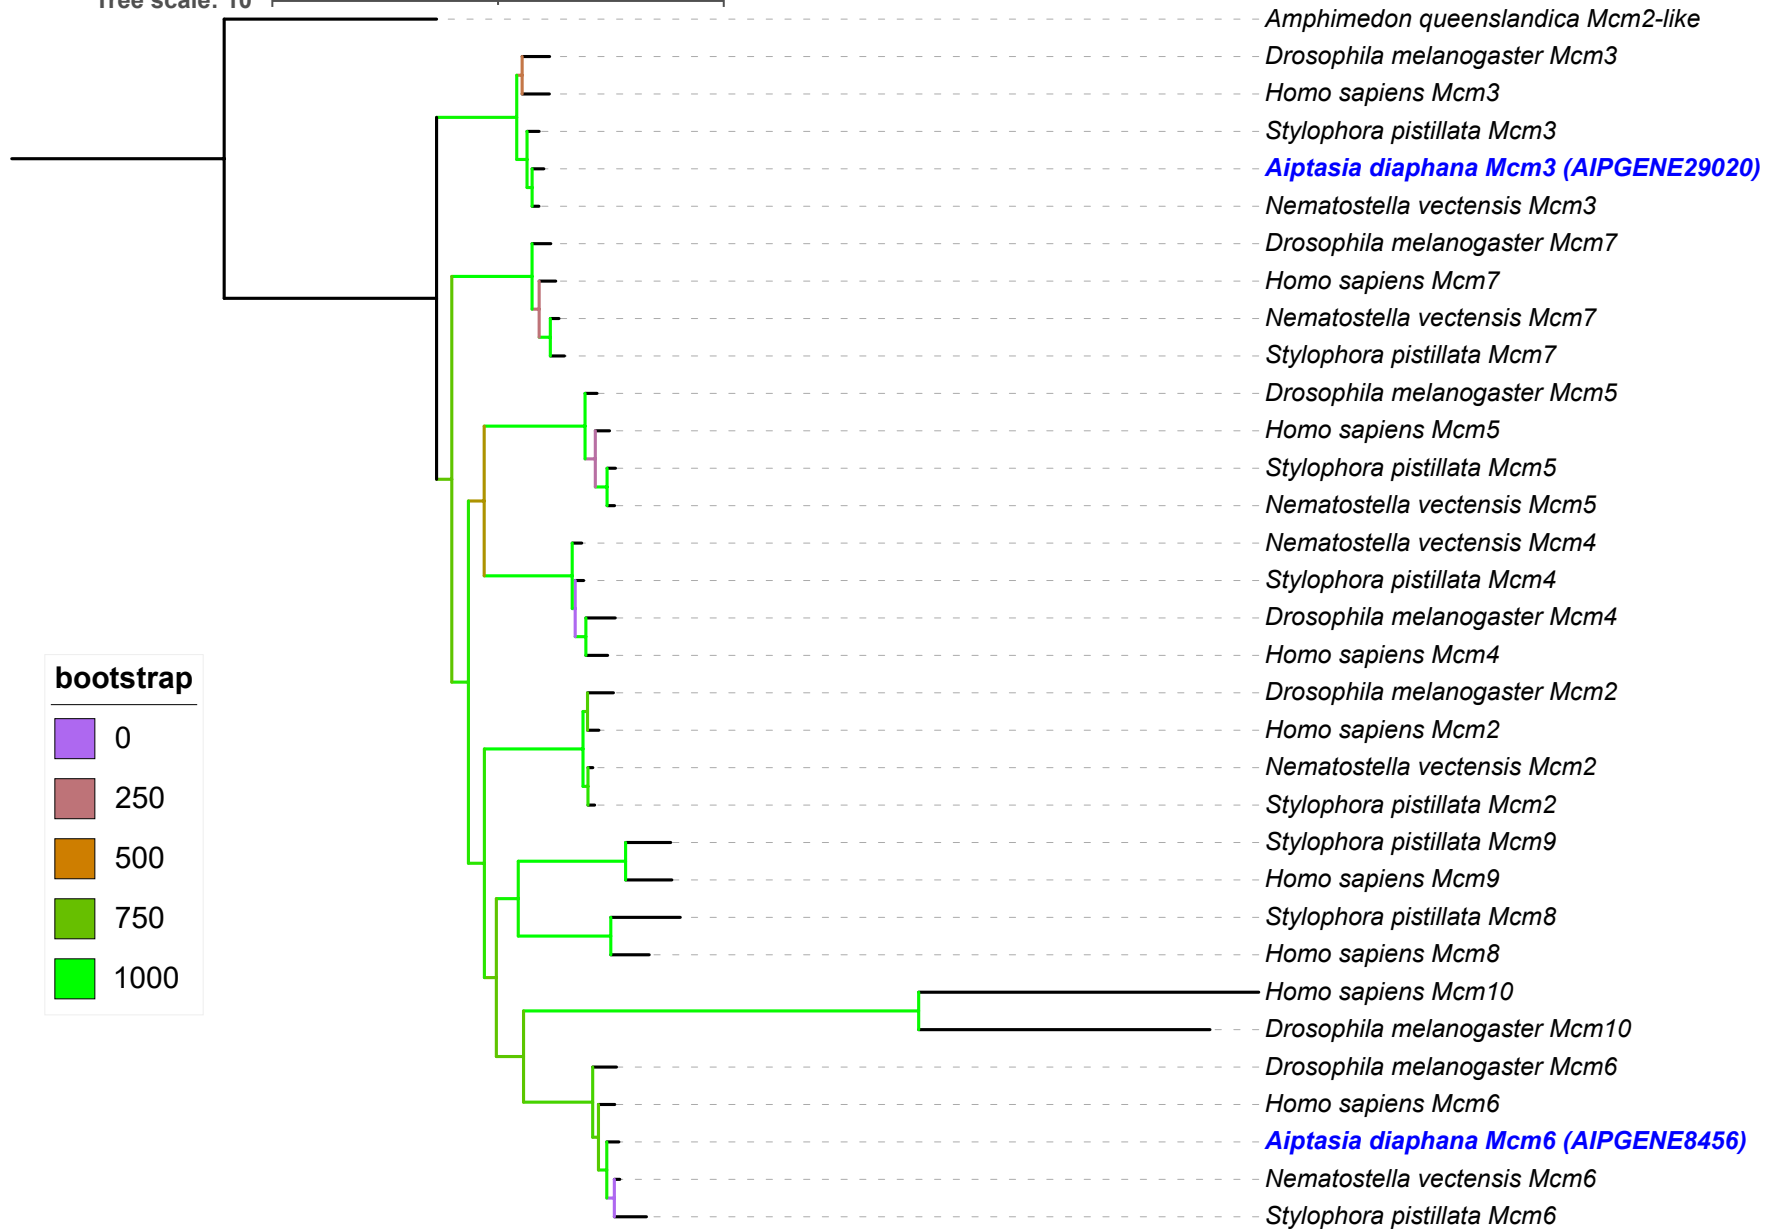

Supplement: f2 [file 3330160.f2.zip › Supplementary Figure 14.pdf]

Tree scale: 1

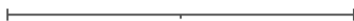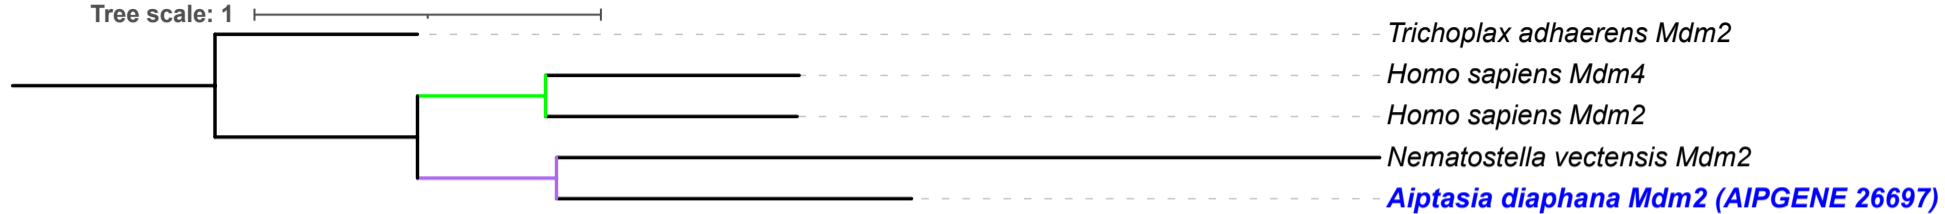

bootstrap

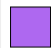

683

714.5

746

777.5

809

Supplement: f2 [file 3330160.f2.zip › Supplementary Figure 15.pdf]

Tree scale: 1

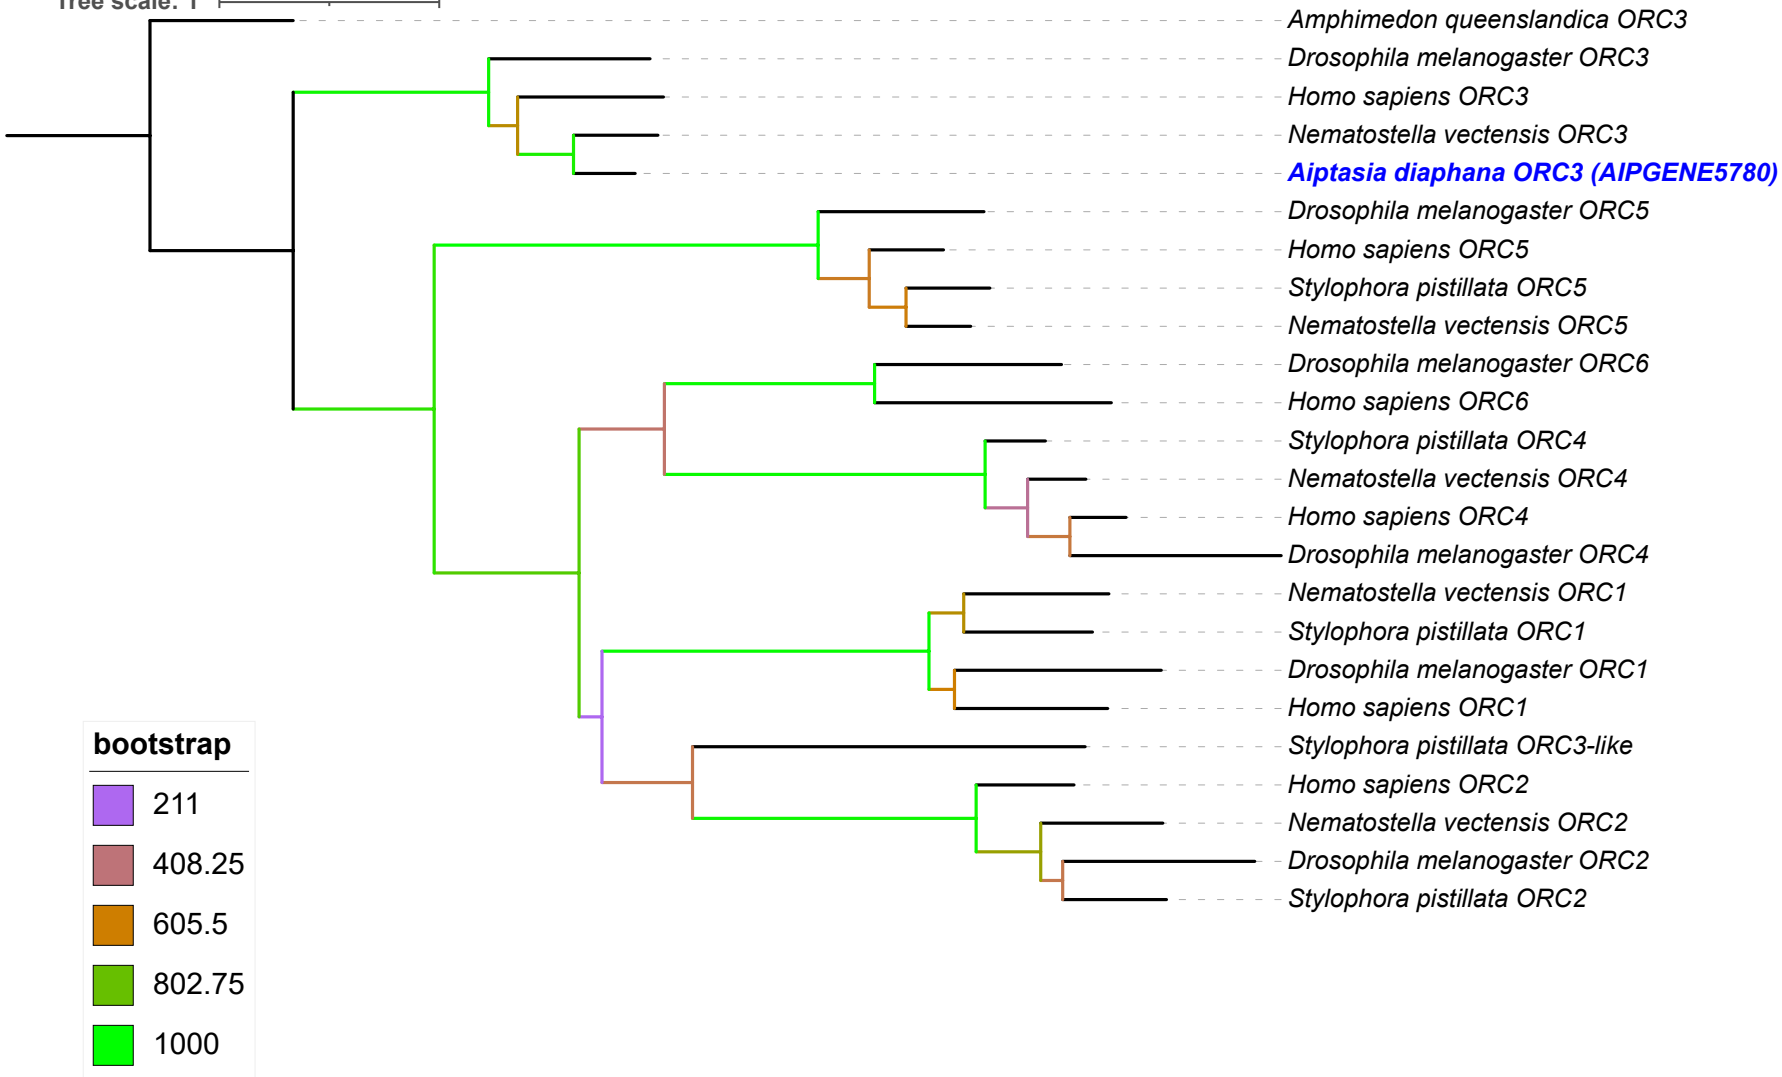

Supplement: f2 [file 3330160.f2.zip › Supplementary Figure 18.pdf]

Tree scale: 1

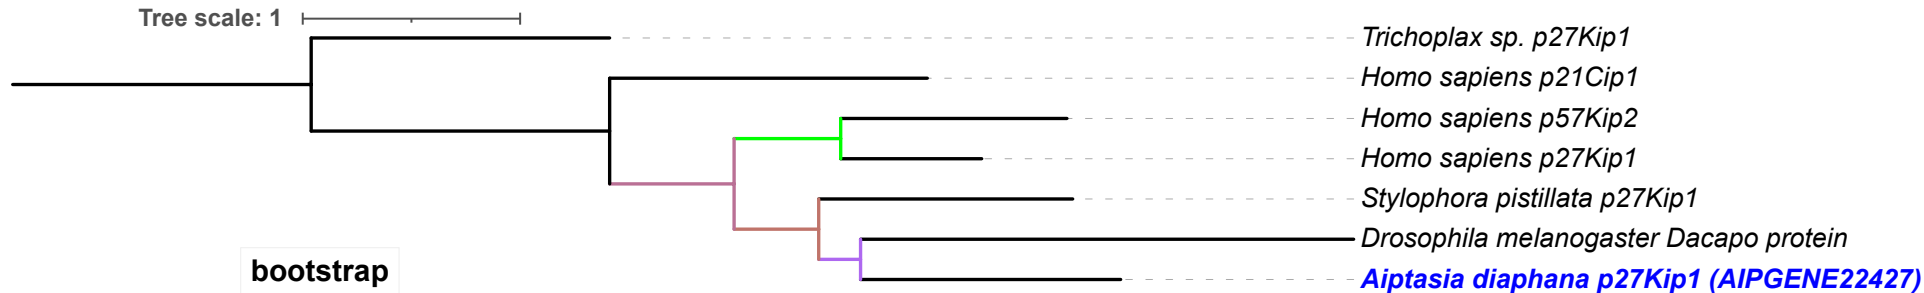

bootstrap

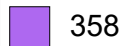

358

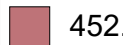

452.5

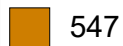

547

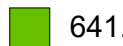

641.5

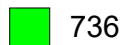

736

Supplement: f2 [file 3330160.f2.zip › Supplementary Figure 19.pdf]

Tree scale: 1

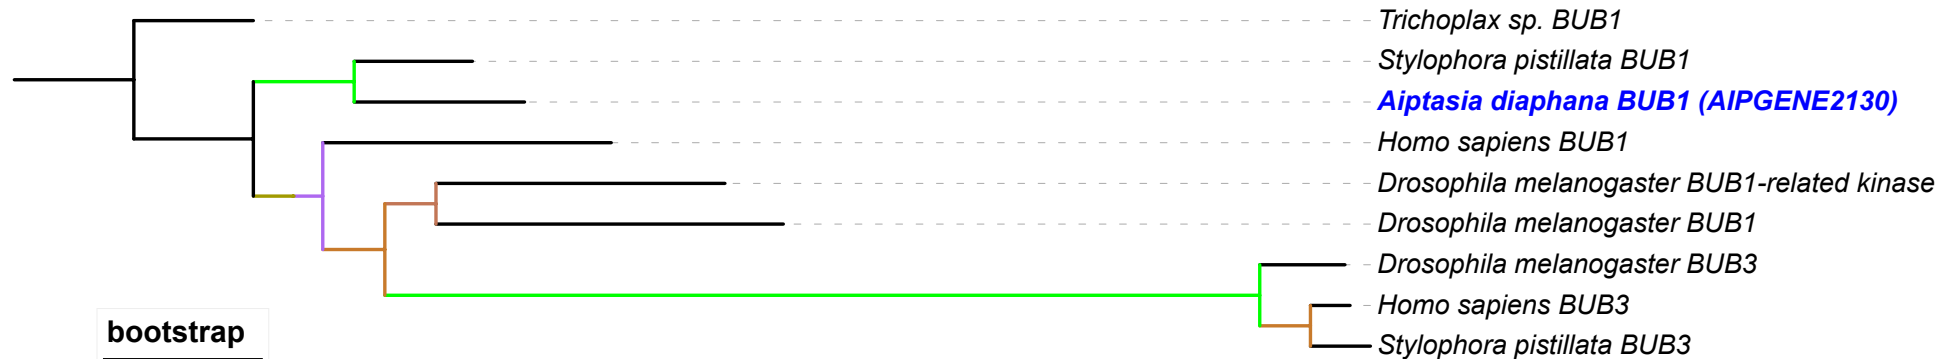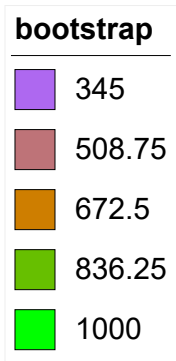

Supplement: f2 [file 3330160.f2.zip › Supplementary Figure 2.pdf]

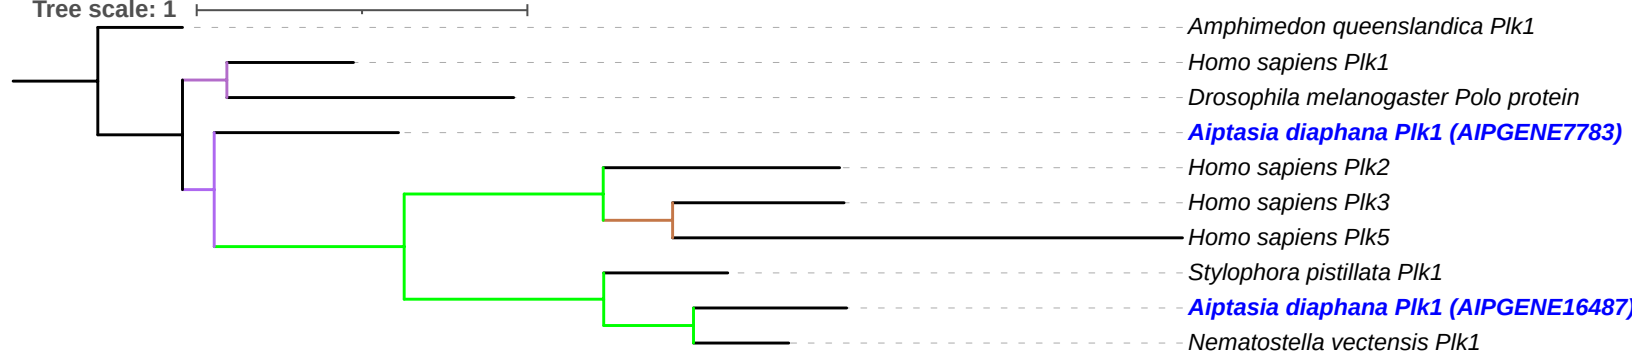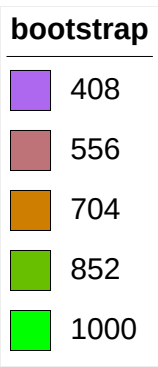

Supplement: f2 [file 3330160.f2.zip › Supplementary Figure 20.pdf]

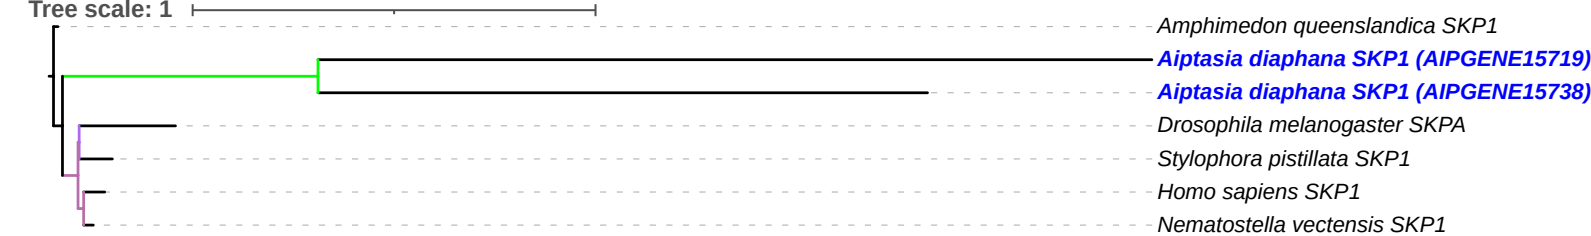

### bootstrap

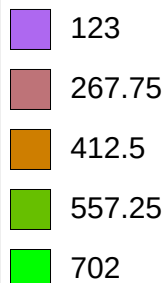

Supplement: f2 [file 3330160.f2.zip › Supplementary Figure 21.pdf]

Tree scale: 0.1

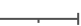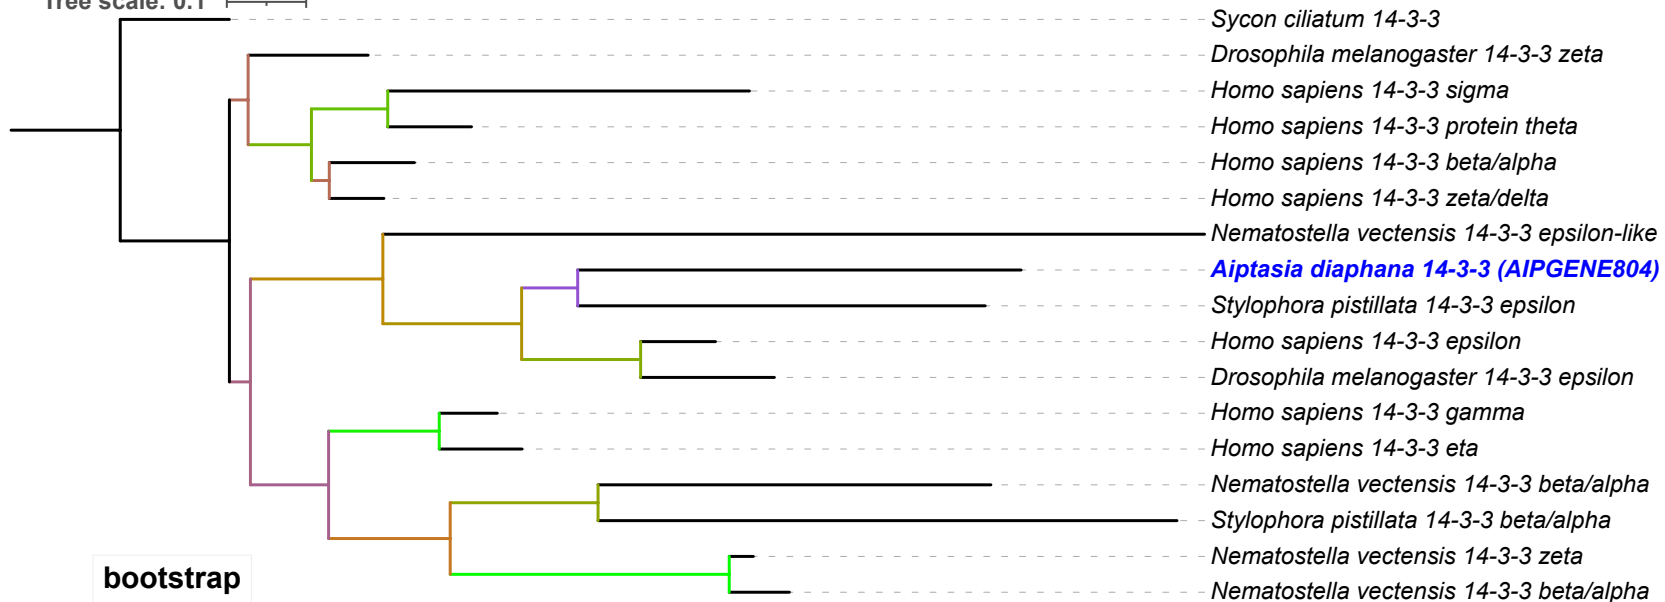

bootstrap

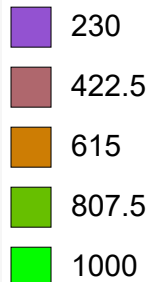

Supplement: f2 [file 3330160.f2.zip › Supplementary Figure 22.pdf]

Tree scale: 1

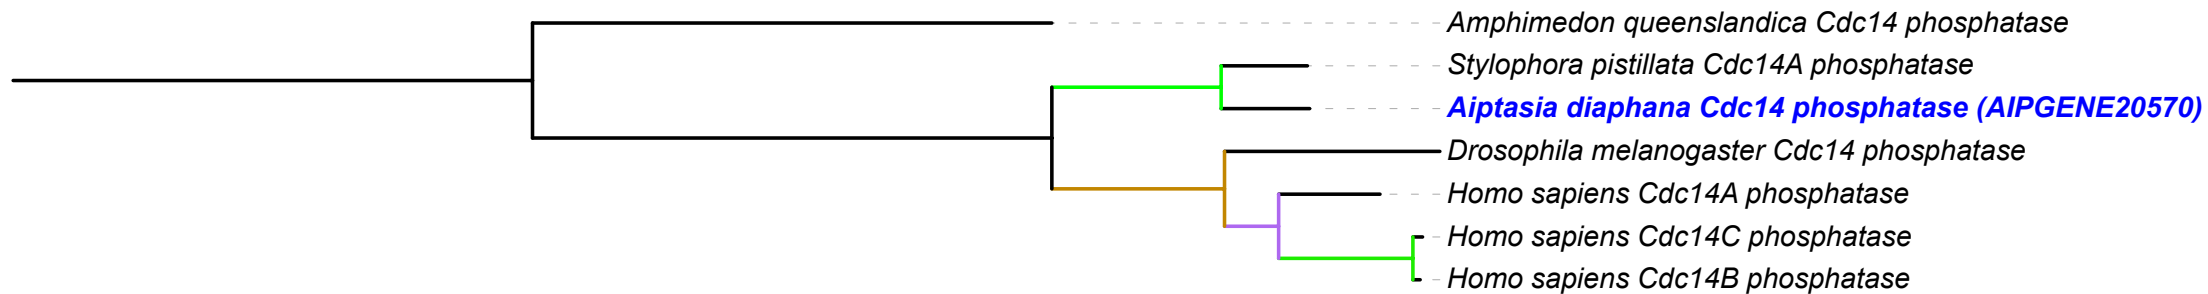

**bootstrap**

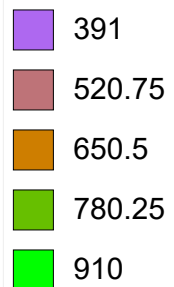

Supplement: f2 [file 3330160.f2.zip › Supplementary Figure 3.pdf]

Tree scale: 0.1

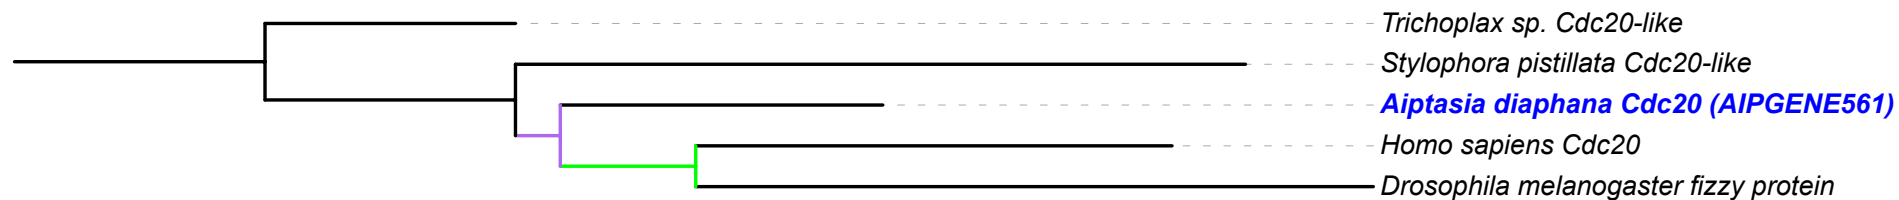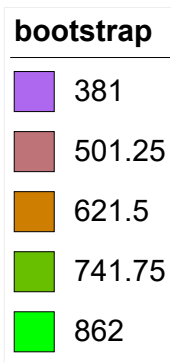

Supplement: f2 [file 3330160.f2.zip › Supplementary Figure 4.pdf]

Tree scale: 1

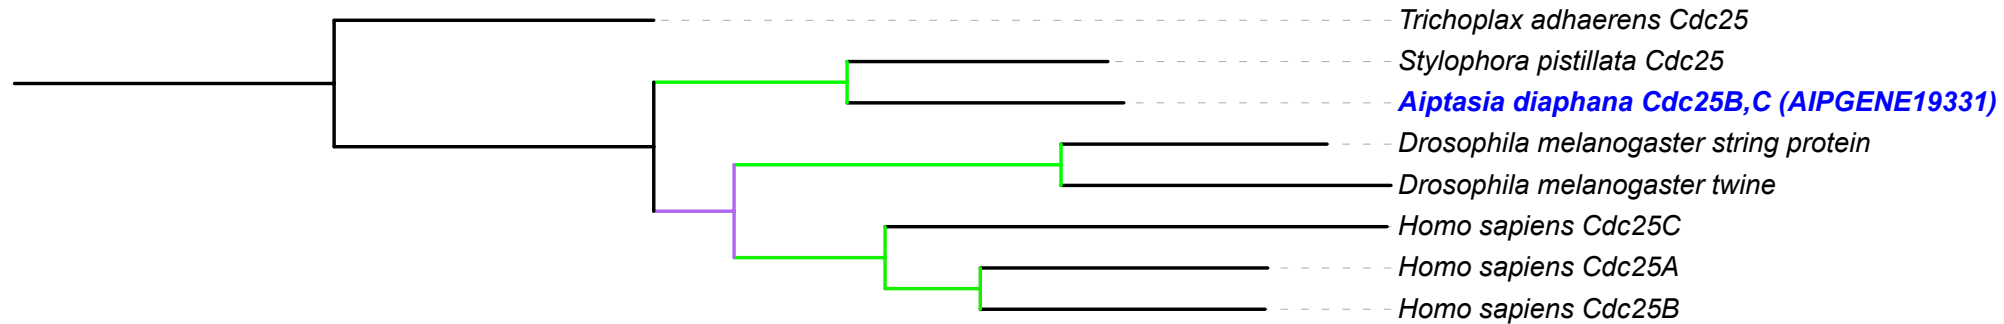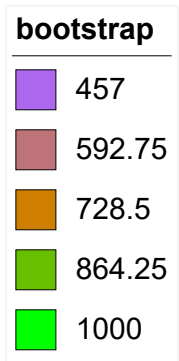

Supplement: f2 [file 3330160.f2.zip › Supplementary Figure 5.pdf]

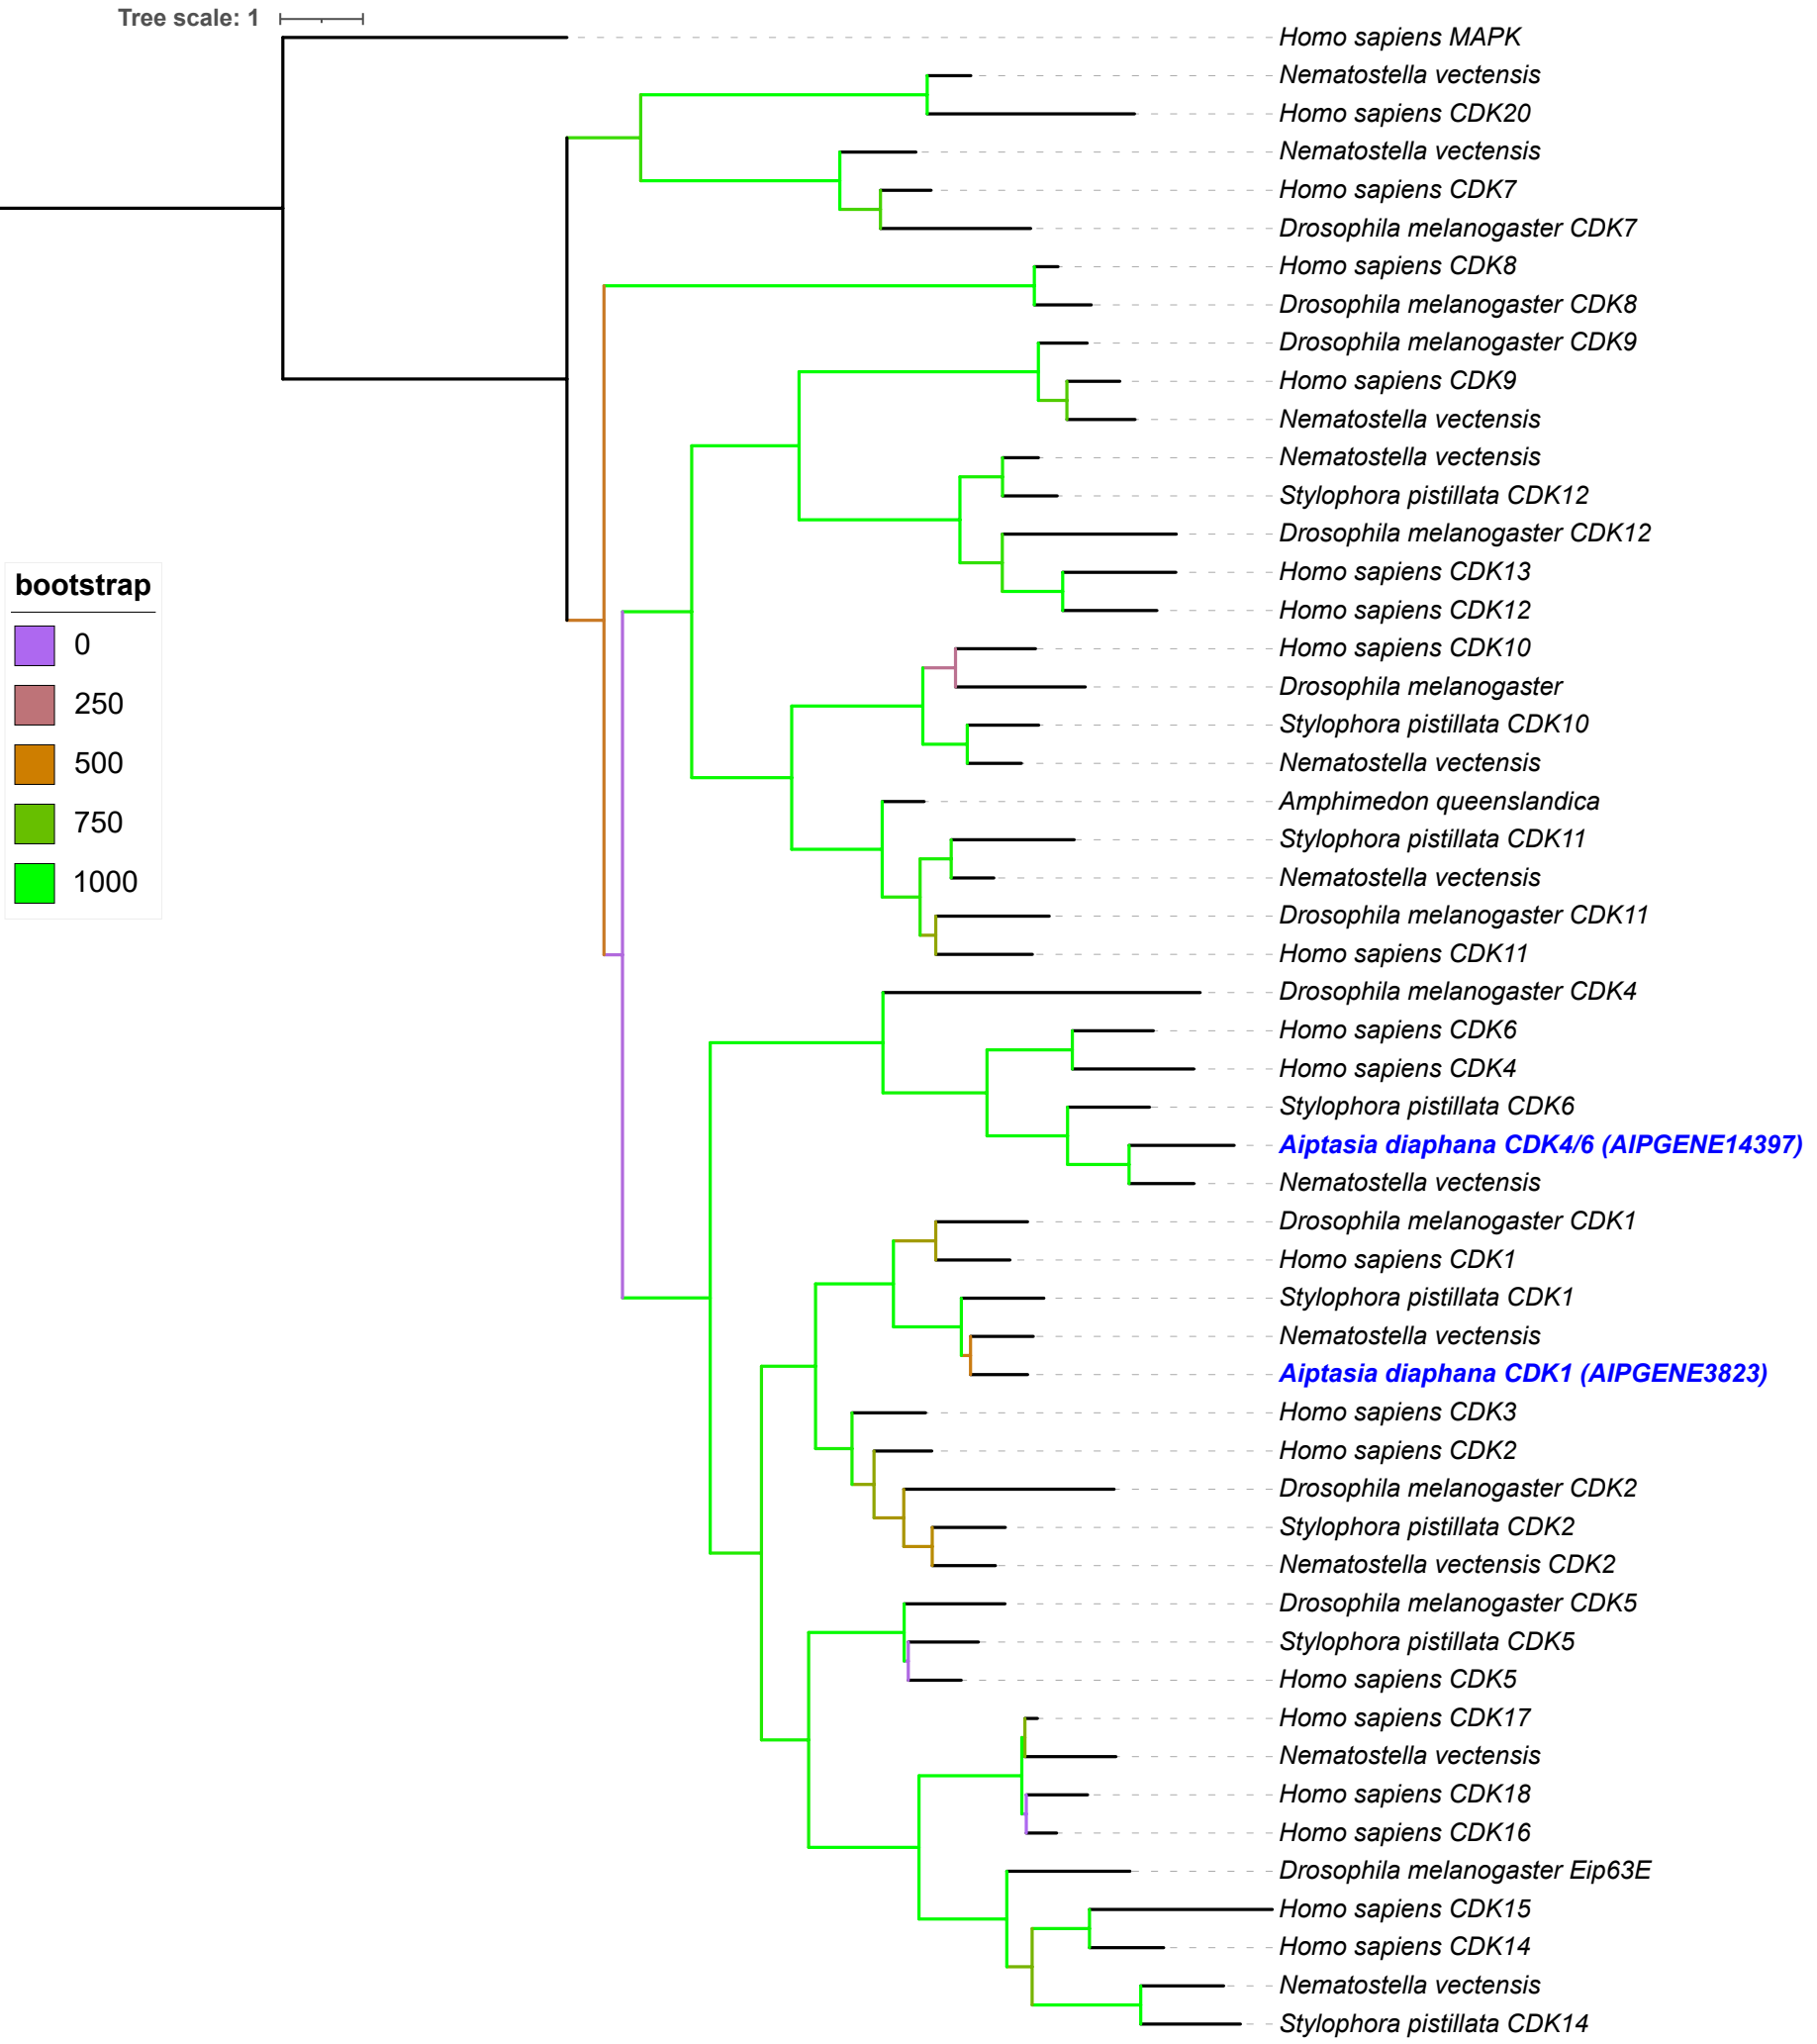

Supplement: f2 [file 3330160.f2.zip › Supplementary Figure 7.pdf]

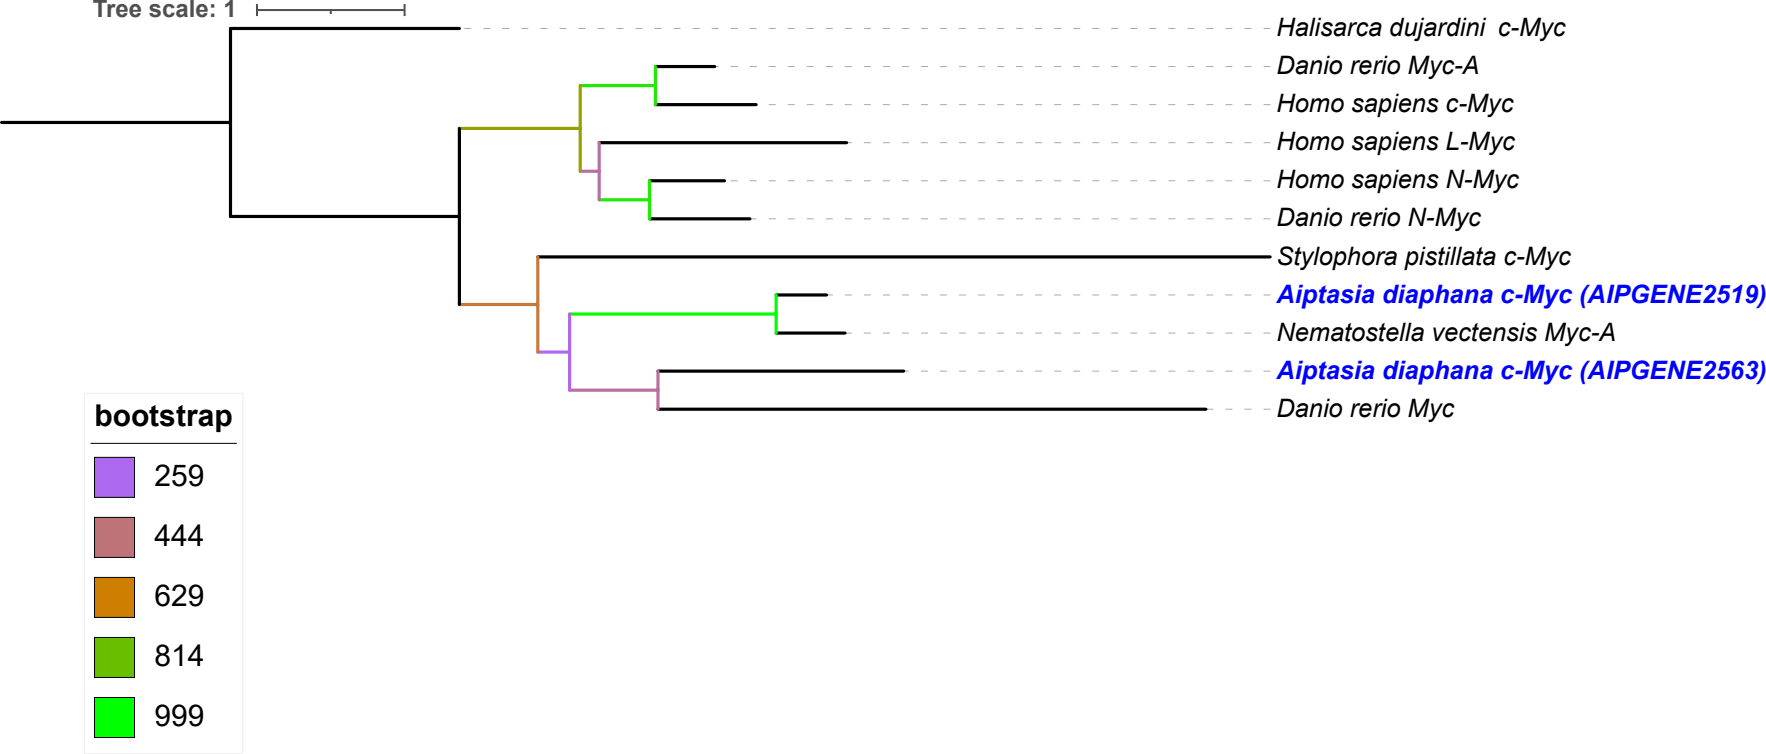

Supplement: f2 [file 3330160.f2.zip › Supplementary Figure 8.pdf]

Tree scale: 1

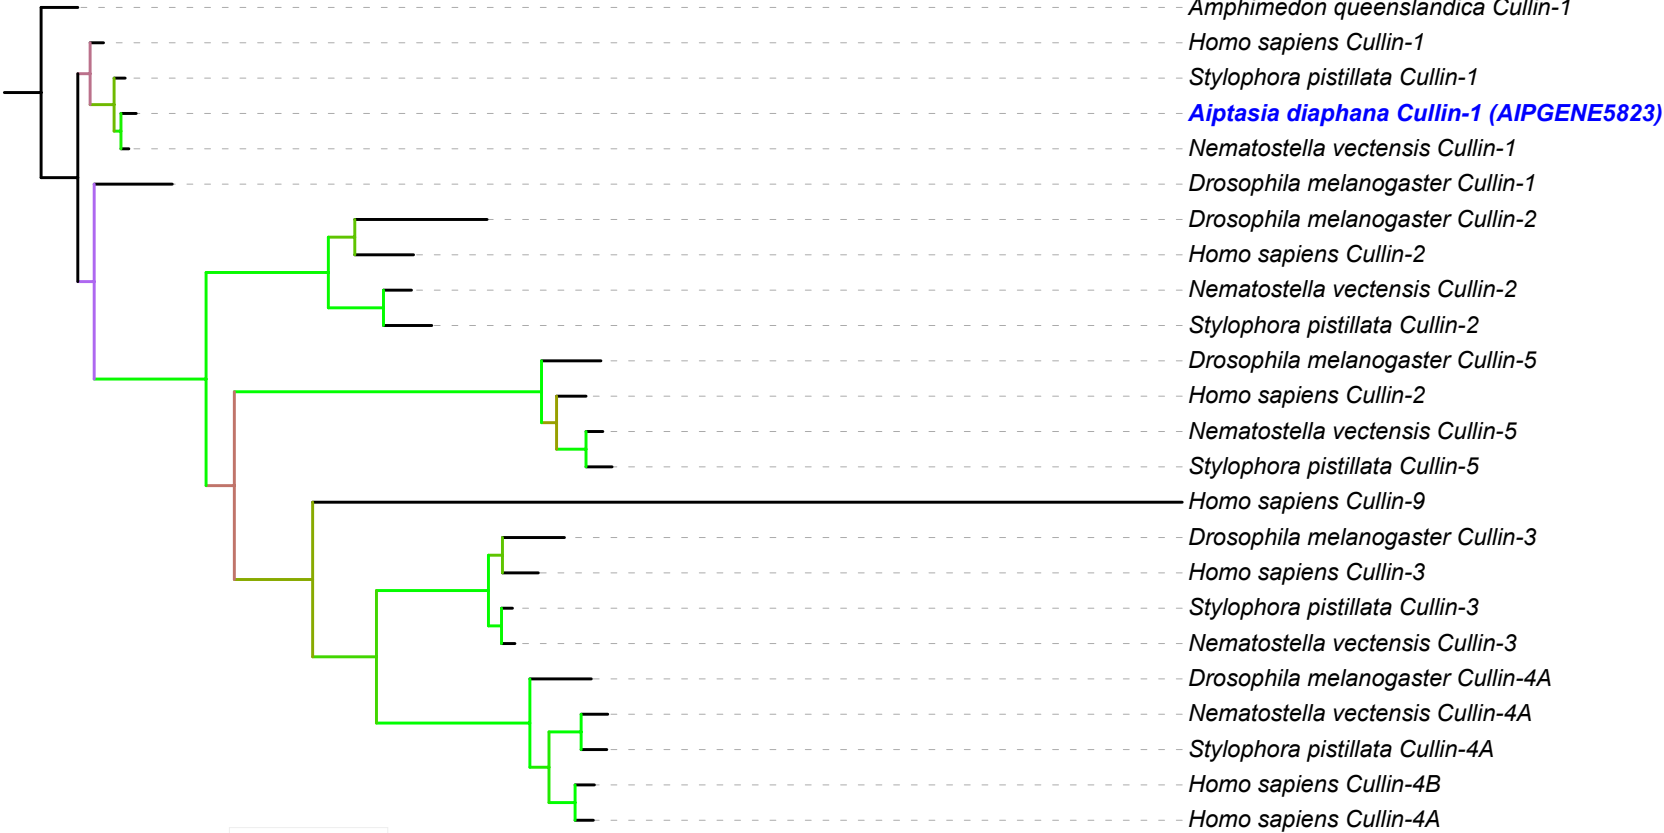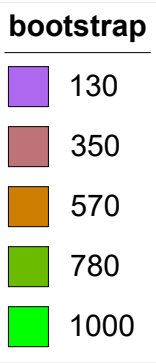

Supplement: f2 [file 3330160.f2.zip › Supplementary Figure 9.pdf]
